# Supplementary material for: Protective role of microglial HO-1 blockade in aging: Implication of iron metabolism
Source: PubMed Central journal article supplement — Redox Biol. 2020 Nov 6;38:101789. doi: 10.1016/j.redox.2020.101789 (PMC7680814; doi:10.1016/j.redox.2020.101789), 2020-11-06
Supplement: mmc1.pdf [file mmc1.pdf]

**Supplemental Table S1. Hemoglobin (Hb), hematocrit (HCT) and mean corpuscular volume (MCV) levels of aged WT and HMOX1<sup>M-KO</sup> mice.**

| <b>Genotype</b>                     | <b>Hb, g/dL</b> | <b>HCT, %</b> | <b>MCV, fL</b> |
|-------------------------------------|-----------------|---------------|----------------|
| <b>WT</b>                           | 12.73 ± 0.85    | 38.40 ± 2.94  | 44.93 ± 2.70   |
| <b>HMOX1<sup>M-KO</sup></b>         | 12.37 ± 1.62    | 37.90 ± 6.23  | 43.50 ± 1.30   |
| <b><i>P</i></b>                     | 0.98 (n.s.)     | 0.99 (n.s.)   | 0.82 (n.s.)    |
| <b>WT LPS</b>                       | 12.70 ± 0.84    | 36.80 ± 2.68  | 43.75 ± 2.47   |
| <b>HMOX1<sup>M-KO</sup><br/>LPS</b> | 12.40 ± 0.56    | 35.0 ± 1.98   | 44.30 ± 0.56   |
| <b><i>P</i></b>                     | 0.99 (n.s.)     | 0.87 (n.s.)   | 0.97 (n.s.)    |
| <b><i>P vs LPS</i></b>              | 0.99 (n.s.)     | 0.99 (n.s.)   | 0.99 (n.s.)    |

Data represent mean ± S.E.M. (N=3/group). Student's t test.
